# Supplementary material
Source: Springer Nature journal article supplement (https://www.springermedizin.de/resource/supplementary/12885_2009_1573_MOESM5_ESM.pdf/9472354)

A

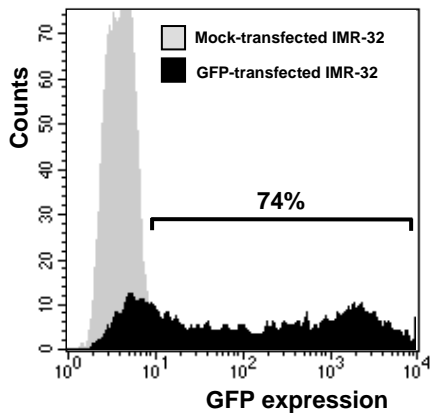

C

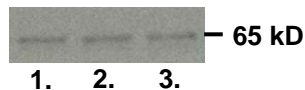

B

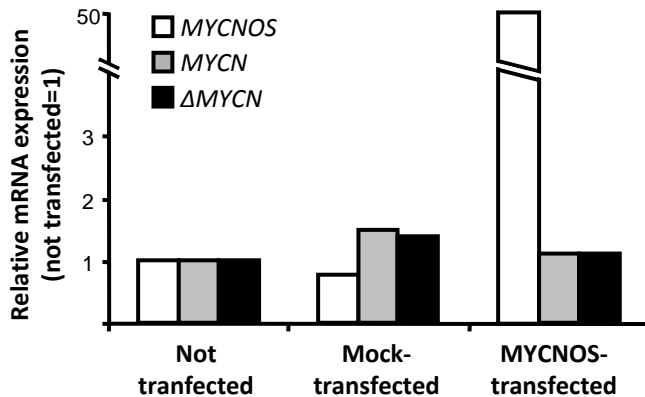

Supplement: MOESM5 [file 9472354]
